# Supplementary material for: Bacteria-template synthesized silver microspheres with hollow and porous structures as excellent SERS substrate
Source: Royal Society of Chemistry journal article supplement (doi:10.1039/c0gc00431f), 2010-01-01
Supplement: c0gc00431f.pdf [file c0gc00431f.pdf]

## Bacteria-template synthesized silver microspheres with hollow and porous structures as excellent SERS substrate

Da-Peng Yang, et al.

### Supporting Information

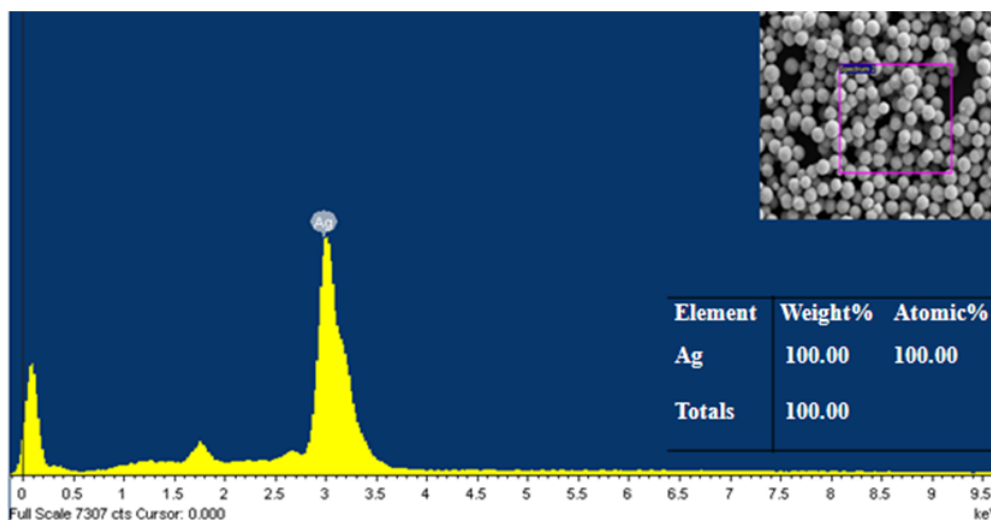

**Fig. S1** EDS analyses of hollow silver microspheres after 2h ultrasound treatment. The bacteria residues have been completely removed.

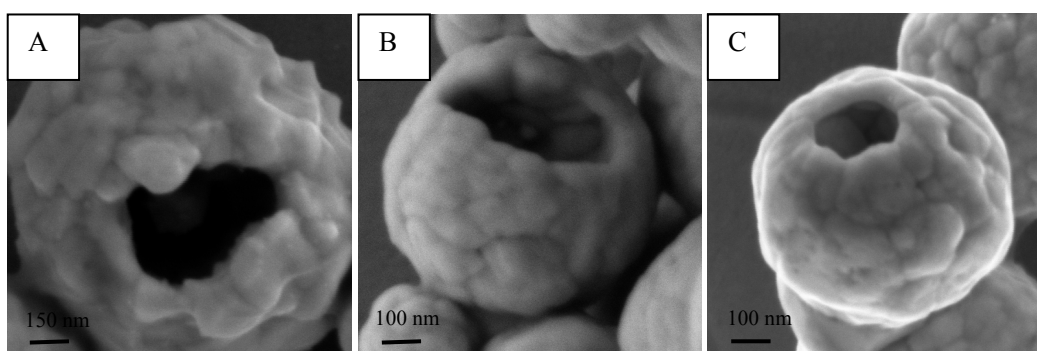

**Fig. S2** SEM images of different shell thickness of silver microspheres by changing the concentrations of precursor. (A)  $\text{AgNO}_3=0.1$  M, the average thickness is 200 nm; (B)  $\text{AgNO}_3=0.01$  M, the average thickness is 150 nm; (C)  $\text{AgNO}_3=0.005$  M, the average thickness is 100 nm.

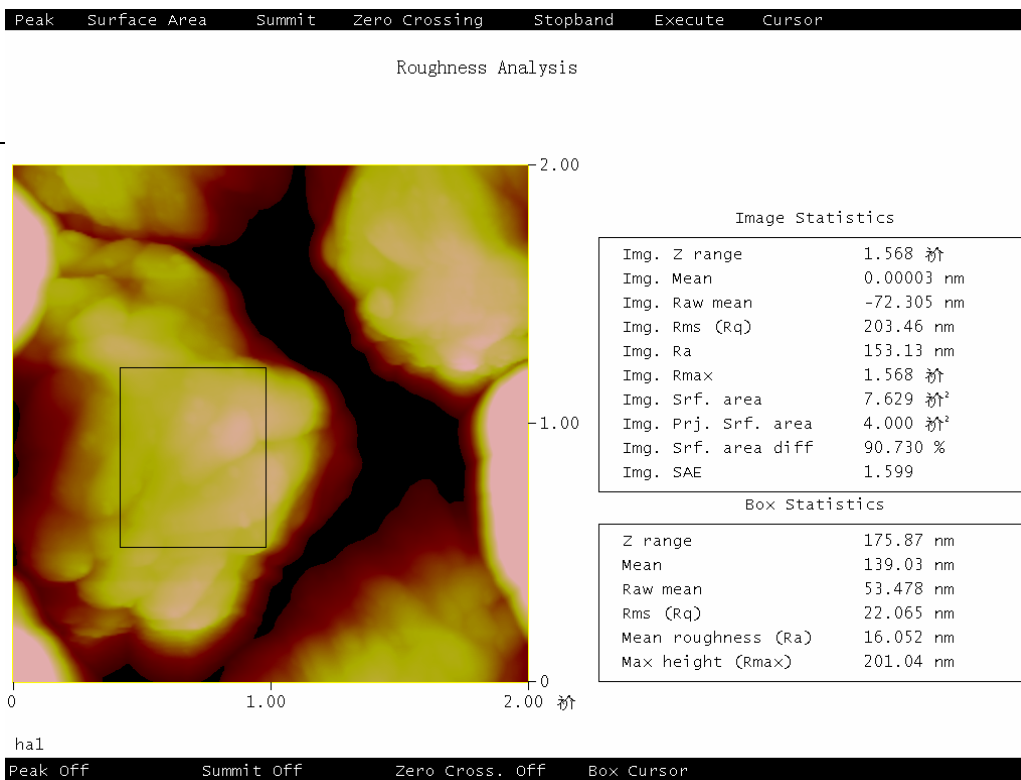

**Fig. S3** The contact mode AFM image of a sub-area of the hollow silver sphere. The image size is  $0.57 \times 0.71$  microns and the maximum height of a feature in the image is 201.4 nm and mean surface roughness is 16.0 nm.

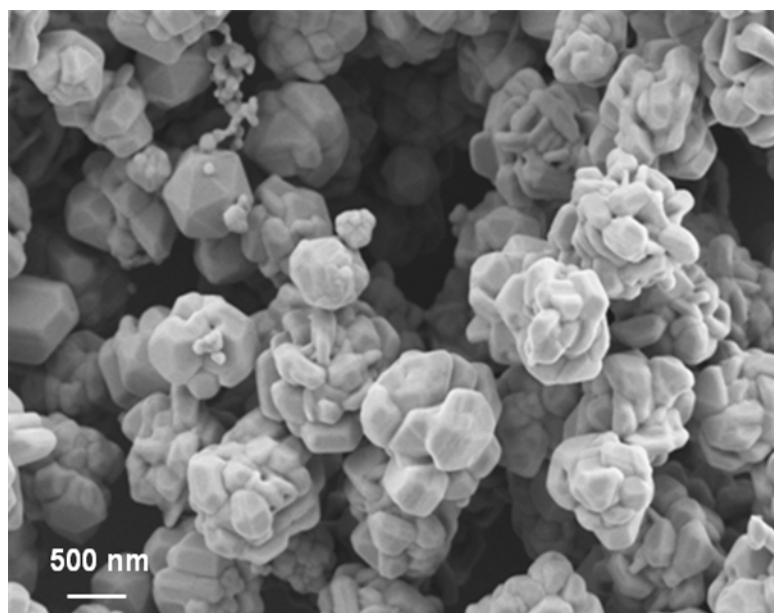

**Fig. S4** SEM images of silver microspheres prepared without bacterium. From it, one can see the individual silver microsphere is made up of some aggregated large silver bulks.

**Estimation of enhancement factor (EF):**

We adopted E. Nalbant method<sup>1</sup> to estimate EF. The following expression was used to calculate the EF:

$$EF = (I_{\text{sers}}/I_{\text{bulk}})/(M_{\text{surf}}/M_{\text{bulk}})$$

Where  $M_{\text{surf}}$  and  $M_{\text{bulk}}$  are the concentration of adsorbed molecules on the Ag microspheres surface and the concentration of the molecules in the bulk sample used in the Raman measurement, respectively. The 0.1 M and  $1 \times 10^{-9}$  M of 2-Mpy concentrations were used for the Raman ( $M_{\text{bulk}}$ ) and SERS ( $M_{\text{surf}}$ ) measurements. The assumption was made that all the 2-Mpy in the SERS sample solution were adsorbed on the Ag microspheres. The  $I_{\text{sers}}$  and  $I_{\text{Raman}}$  were measured for the RB mode at  $1002 \text{ cm}^{-1}$ .

References :

1 E. N. Esenturk and A. R. H. Walker, J Raman Spectrosc, 2009, 40, 86-91.
